# Supplementary material
Source: PubMed Central journal article supplement (PMC545806)
Supplement: 7600511s1.pdf [file 7600511s1.pdf]

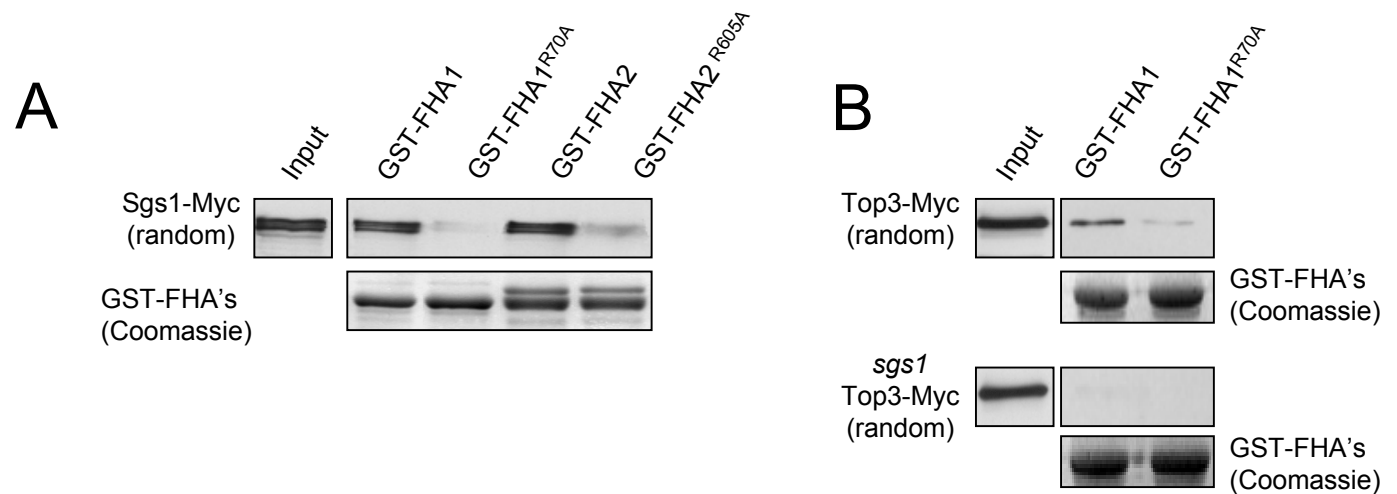

(A) Yeast cells expressing Myc-Sgs1 in log phase from either random or HU blocked cells were lysed by spheroblasting and processed for chromatin fractionation. The chromatin fraction containing Myc-Sgs1 was added to glutathione bound GST-FHA domains of Rad53: wild-type FHA1 and FHA2, and mutants FHA1<sup>R70A</sup> and FHA2<sup>R650A</sup>. The input representing 5% of the total sample and the elute were analysed by immunoblotting with 9E10 mAb for Sgs1-Myc (upper panel). A fraction were analysed by SDS-PAGE to detect GST-FHA fusion protein (lower panel). (B) Log phase random cultures of GA-1801 (expressing Myc-Top3) and GA-1913 (expressing Myc-Top3 in an *sgs1* deletion strain) were processed in the same way as describe in A. Either wild type GST-FHA1 or the mutant GST-FHA1<sup>R70A</sup> were used for the pull down experiments. The eluates were analysed by immunoblotting with 9E10 mAb for Myc-Top3 (upper panel) and a fraction were analysed by SDS-PAGE to visualise GST-FHA fusion proteins by Coomassie staining (lower panel).
