# Supplementary material
Source: PubMed Central journal article supplement (PMC545806)
Supplement: 7600511s2.pdf [file 7600511s2.pdf]

## Supplementary Figure S2

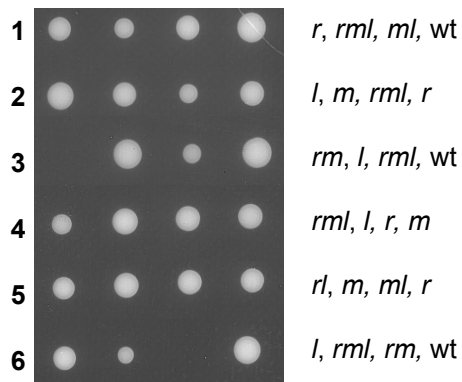

Haploid colonies resulting from dissection of 6 tetrads obtained from a cross between GA-2135 and GA-2495. The genotypes of the colonies are indicated on the right. Wt, wild-type; *r*, *rad24::TRP1*; *m*, *mrc1-2::HIS3*; *l*, *sml1::KanMX6*; *rm*, *ml*, *rl* and *rml* are the genotypes of the double and triple mutants, respectively.
