# Supplementary material
Source: PubMed Central journal article supplement (PMC545806)
Supplement: 7600511s4.pdf [file 7600511s4.pdf]

## Supplementary Figure S4

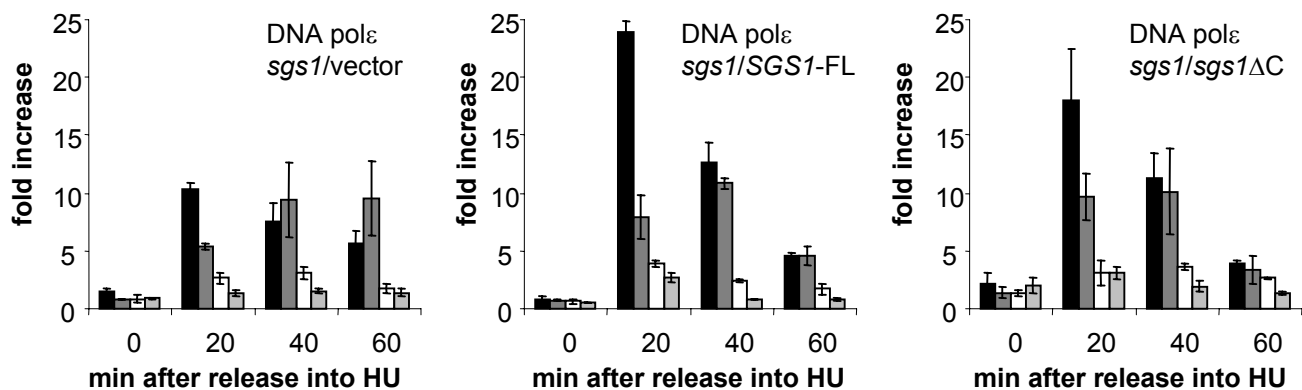

GA-2450 bearing empty plasmid pRS415, or pRS415 with full length SGS1 (*SGS1*-FL) or a C-terminal truncated allele *sgs1* $\Delta$ C (truncated at amino acid position 1295) were grown on selective media and then synchronised with  $\alpha$ -factor in YPAD, prior to ChIP. ChIP was performed on Myc-tagged DNA pol  $\epsilon$ . Shading of the bars are as described in Figure 5.
