# Supplementary material
Source: PubMed Central journal article supplement (PMC545806)
Supplement: 7600511s5.pdf [file 7600511s5.pdf]

## Supplementary Figure S5

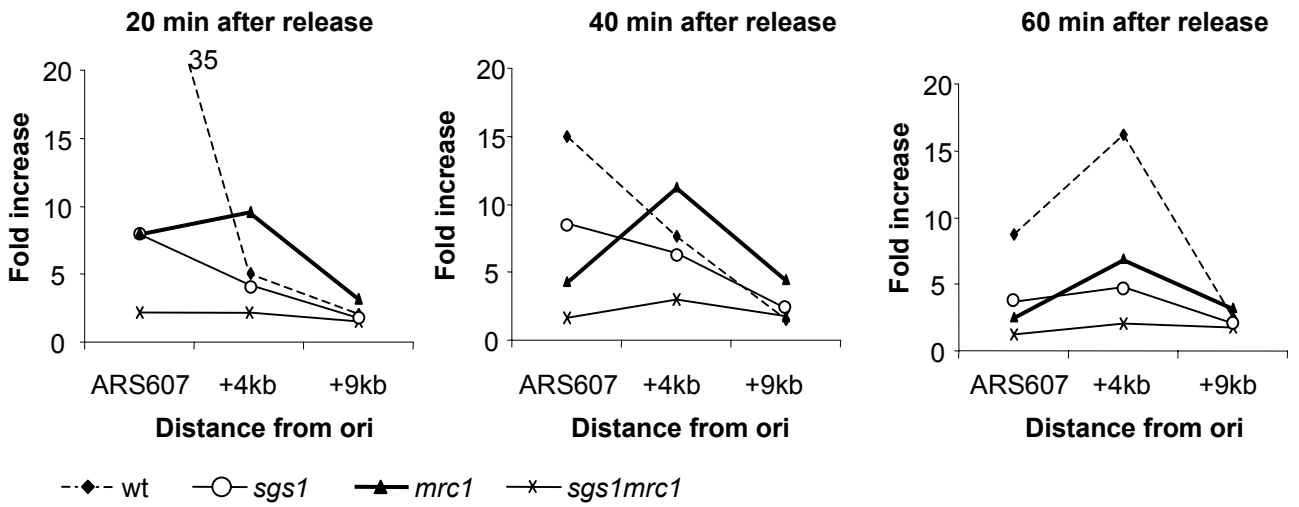

DNA pol  $\epsilon$  progress beyond the site of stalling in *mrc1* cells, while they do not in *sgs1* cells. ChIP data from Fig 6, where the fold increase for Wt, *sgs1*, *mrc1* and *sgs1mrc1* cells are displayed in the same graph as a function of distance at a given time.
