# Supplementary material
Source: PubMed Central journal article supplement (PMC545806)
Supplement: 7600511s6.pdf [file 7600511s6.pdf]

## **Supplementary data**

### **Material and Methods**

#### ***Purification of GST-FHA fusion proteins and pull-down assays***

*E. coli* cultures containing GST-FHA1, GST-FHA2, GST-FHA1<sup>R70A</sup> or GST-FHA2<sup>R605A</sup> (Durocher et al., 1999) were induced for 3h by 1mM IPTG after culturing in LB to OD<sub>600</sub>=0.8. Cells were resuspended in PBS, sonicated, adjusted to 1% Triton X-100, and the supernatant was recovered after centrifugation at 13,000 rpm for 20 min at 4°C. Aliquots were stored in 15% glycerol at -80°C. GST-FHA fusions from the *E. coli* extracts were bound to glutathione agarose beads (Sigma) in 1 x PBS with 1% Triton X-100 for 45 min at 4°C. Beads were washed three times with PBS/Triton and resuspended in the same buffer. One volume of chromatin extract (see below) was bound to beads for 90 min at 4°C. The beads were washed for 10 min three times in 0.5x PBS with 50 mM Tris-Cl pH 7.4, 1% Triton X-100 and 2 mM EDTA. Proteins were eluted in SDS containing sample buffer by heating for 5 min, followed by SDS-PAGE and Western blotting with anti-Myc mAb 9E10 for Myc-Sgs1 and Myc-Top3.

#### ***Chromatin fractionation***

Chromatin fractionation was performed as described (Frei and Gasser, 2000), except that the first chromatin fraction was resuspended in 50 mM Tris-Cl pH 7.4, 5 mM MgCl<sub>2</sub>, 0.5% Triton X-100, with 50 U Dnase I (Roche Molecular Biology), protease inhibitors: 300 µg/ml benzamidine, 1 µg/ml pepstatin, 2 µg/ml antipain, 0.5 µg/ml leupeptin, 100 µg/ml TPCK and 50 µg/ml TLCK. After 10 min at 4°C, EDTA was added to 10mM. After centrifugation at 13,000 rpm at 4°C for 15 min, the supernatant was used as the extract in the GST pull-down assay.

### **Reference**

Durocher, D., Henckel, J., Fersht, A.R. and Jackson, S.P. (1999) The FHA domain is a modular phosphopeptide recognition motif. *Mol Cell*, 4, 387-394.
